# Supplementary material
Source: PubMed Central journal article supplement (PMC5759699)
Supplement: 10.4085_1062-6050-52.12.22.s1.pdf [file 10.4085_1062-6050-52.12.22.s1.pdf]

# Supplemental Table 1. Comparison of Uninjured and Injured Operators' Values

| Variable                                       | Uninjured Group |                  |         |                  | All Injuries |                 |        |                  | Lower Extremity Injuries |    |                 |        | Upper Extremity Injuries |                    |    |                 | Spine Injuries |                  |                    |    |                 |        |                  |                   |
|------------------------------------------------|-----------------|------------------|---------|------------------|--------------|-----------------|--------|------------------|--------------------------|----|-----------------|--------|--------------------------|--------------------|----|-----------------|----------------|------------------|--------------------|----|-----------------|--------|------------------|-------------------|
|                                                | n               | Mean ± SD        | Median  | IQR <sup>a</sup> | n            | Mean ± SD       | Median | IQR <sup>a</sup> | P Value                  | n  | Mean ± SD       | Median | IQR <sup>a</sup>         | P Value            | n  | Mean ± SD       | Median         | IQR <sup>a</sup> | P Value            | n  | Mean ± SD       | Median | IQR <sup>a</sup> | P Value           |
| <b>Demographics</b>                            |                 |                  |         |                  |              |                 |        |                  |                          |    |                 |        |                          |                    |    |                 |                |                  |                    |    |                 |        |                  |                   |
| Age, yr <sup>b,c</sup>                         | 48              | 31.4 ± 4.6       | 30.0    | 29.0, 33.0       | 47           | 32.5 ± 5.3      | 31.5   | 27.0, 33.8       | .296                     | 26 | 32.2 ± 5.2      | 31.5   | 28.0, 32.8               | 0.802              | 17 | 34.2 ± 5.6      | 35.0           | 26.0, 36.8       | 0.039 <sup>e</sup> | 23 | 32.7 ± 5.1      | 32.0   | 31.3, 39.5       | .580              |
| Height, cm                                     | 48              | 179.7 ± 4.9      | 180.3   | 176.5, 182.9     | 47           | 178.7 ± 6.3     | 179.5  | 174.7, 181.0     | .377                     | 26 | 179.3 ± 6.5     | 179.7  | 175.9, 182.2             | 0.960              | 17 | 177.4 ± 7.3     | 177.8          | 172.9, 180.3     | 0.158              | 23 | 179.8 ± 6.9     | 177.6  | 171.5, 186.0     | .627              |
| Weight, kg <sup>c,f</sup>                      | 48              | 86.1 ± 10.5      | 83.3    | 79.1, 91.8       | 47           | 85.8 ± 11.2     | 82.4   | 75.2, 87.5       | .515                     | 26 | 87.6 ± 12.3     | 82.4   | 76.2, 87.0               | 0.354              | 17 | 84.1 ± 12.8     | 79.4           | 71.6, 88.0       | 0.210              | 23 | 89.9 ± 12.7     | 87.3   | 77.3, 100.6      | .131              |
| Body mass index, kg/m <sup>2,c,f</sup>         | 48              | 26.6 ± 2.9       | 25.4    | 24.0, 27.5       | 47           | 26.6 ± 2.5      | 25.8   | 23.9, 27.1       | .870                     | 26 | 27.2 ± 2.9      | 25.8   | 23.4, 26.8               | 0.279              | 17 | 26.6 ± 2.7      | 25.1           | 23.9, 27.1       | 0.835              | 23 | 27.8 ± 2.9      | 27.7   | 25.9, 29.4       | .046 <sup>g</sup> |
| <b>Physiology</b>                              |                 |                  |         |                  |              |                 |        |                  |                          |    |                 |        |                          |                    |    |                 |                |                  |                    |    |                 |        |                  |                   |
| Body fat, % <sup>c</sup>                       | 48              | 17.0 ± 4.2       | 15.1    | 13.0, 18.7       | 47           | 17.6 ± 6.3      | 14.8   | 9.2, 18.4        | .612                     | 26 | 18.0 ± 6.2      | 13.6   | 8.9, 19.3                | 0.761              | 17 | 17.3 ± 7.4      | 14.8           | 8.5, 17.2        | 0.971              | 23 | 18.6 ± 6.3      | 18.5   | 12.0, 21.7       | .171              |
| Anaerobic power, W/kg                          | 19              | 14.1 ± 1.0       | 14.3    | 13.6, 14.7       | 21           | 13.7 ± 1.7      | 13.7   | 11.9, 15.6       | .321                     | 12 | 13.3 ± 1.8      | 12.7   | 11.3, 15.2               | 0.084              | 11 | 14.4 ± 1.6      | 14.8           | 13.1, 15.9       | 0.156              | 8  | 13.5 ± 1.5      | 13.2   | 11.8, 14.7       | .418              |
| Anaerobic capacity, W/kg <sup>c</sup>          | 19              | 8.5 ± 0.8        | 8.8     | 8.5, 9.0         | 21           | 8.6 ± 1.2       | 9.0    | 8.6, 9.6         | .698                     | 12 | 8.4 ± 1.4       | 9.0    | 8.7, 9.8                 | 0.573              | 11 | 8.6 ± 1.1       | 8.9            | 8.6, 10.4        | 0.794              | 8  | 8.4 ± 0.9       | 8.9    | 8.1, 9.3         | .678              |
| VO <sub>2</sub> max, mL/min/kg <sup>c</sup>    | 45              | 47.8 ± 4.8       | 49.3    | 47.8, 53.0       | 45           | 46.0 ± 4.9      | 48.0   | 46.1, 52.9       | .098                     | 25 | 45.8 ± 4.1      | 48.0   | 46.03, 52.33             | 0.201              | 16 | 47.8 ± 5.7      | 46.9           | 46.4, 52.9       | 0.439              | 22 | 44.8 ± 3.9      | 46.9   | 42.8, 54.4       | .013 <sup>g</sup> |
| <b>Strength</b>                                |                 |                  |         |                  |              |                 |        |                  |                          |    |                 |        |                          |                    |    |                 |                |                  |                    |    |                 |        |                  |                   |
| Extension, % Body mass                         |                 |                  |         |                  |              |                 |        |                  |                          |    |                 |        |                          |                    |    |                 |                |                  |                    |    |                 |        |                  |                   |
| Left knee <sup>c</sup>                         | 40              | 234.10 ± 30.58   | 222.73  | 202.90, 236.62   | 38           | 222.27 ± 44.16  | 224.16 | 201.92, 276.19   | .175                     | 20 | 214.06 ± 34.87  | 224.16 | 204.75, 267.99           | 0.051              | NA | NA              | NA             | NA               | NA                 | 18 | 211.08 ± 46.68  | 223.10 | 187.75, 266.27   | .036 <sup>g</sup> |
| Right knee                                     | 40              | 239.71 ± 32.75   | 235.86  | 212.79, 254.55   | 38           | 239.02 ± 46.69  | 245.54 | 207.23, 287.60   | .940                     | 20 | 221.19 ± 38.78  | 224.72 | 198.55, 266.11           | 0.017 <sup>g</sup> | NA | NA              | NA             | NA               | NA                 | 18 | 238.78 ± 49.92  | 265.26 | 242.65, 282.61   | .944              |
| Flexion, % Body weight                         |                 |                  |         |                  |              |                 |        |                  |                          |    |                 |        |                          |                    |    |                 |                |                  |                    |    |                 |        |                  |                   |
| Left knee <sup>c</sup>                         | 40              | 128.35 ± 23.62   | 120.28  | 105.45, 150.20   | 38           | 123.35 ± 22.15  | 125.77 | 106.87, 147.64   | .338                     | 20 | 120.45 ± 22.58  | 134.59 | 107.11, 144.59           | 0.348              | NA | NA              | NA             | NA               | NA                 | 18 | 119.31 ± 21.54  | 109.88 | 101.01, 134.74   | .165              |
| Right knee <sup>c</sup>                        | 40              | 130.27 ± 21.10   | 127.45  | 121.00, 138.64   | 38           | 127.40 ± 25.61  | 122.39 | 108.15, 148.95   | .726                     | 20 | 125.88 ± 24.08  | 132.14 | 112.81, 144.36           | 0.991              | NA | NA              | NA             | NA               | NA                 | 18 | 123.40 ± 24.52  | 109.93 | 93.39, 150.68    | .258              |
| Flexion/extension ratio                        |                 |                  |         |                  |              |                 |        |                  |                          |    |                 |        |                          |                    |    |                 |                |                  |                    |    |                 |        |                  |                   |
| Left knee                                      | 40              | 0.55 ± 0.07      | 0.56    | 0.49, 0.62       | 38           | 0.56 ± 0.08     | 0.54   | 0.53, 0.60       | .434                     | 20 | 0.57 ± 0.08     | 0.54   | 0.52, 0.61               | 0.504              | NA | NA              | NA             | NA               | NA                 | 18 | 0.58 ± 0.10     | 0.53   | 0.47, 0.54       | .554              |
| Right knee <sup>c,e,f</sup>                    | 40              | 0.55 ± 0.09      | 0.56    | 0.50, 0.62       | 38           | 0.55 ± 0.13     | 0.55   | 0.43, 0.61       | .624                     | 20 | 0.58 ± 0.16     | 0.58   | 0.50, 0.63               | 0.308              | NA | NA              | NA             | NA               | NA                 | 18 | 0.53 ± 0.15     | 0.40   | 0.39, 0.55       | .297              |
| Internal rotation, % Body weight               |                 |                  |         |                  |              |                 |        |                  |                          |    |                 |        |                          |                    |    |                 |                |                  |                    |    |                 |        |                  |                   |
| Left shoulder <sup>c,d</sup>                   | 40              | 57.18 ± 11.66    | 57.37   | 52.12, 67.87     | 39           | 58.32 ± 12.15   | 57.09  | 47.21, 62.49     | .505                     | NA | NA              | NA     | NA                       | NA                 | 16 | 57.25 ± 11.71   | 54.86          | 45.96, 61.55     | 0.893              | NA | NA              | NA     | NA               | NA                |
| Right shoulder <sup>d</sup>                    | 40              | 61.34 ± 13.17    | 62.62   | 56.36, 71.70     | 39           | 58.02 ± 11.78   | 55.43  | 49.18, 65.88     | .242                     | NA | NA              | NA     | NA                       | NA                 | 16 | 57.49 ± 11.37   | 55.43          | 47.56, 64.12     | 0.407              | NA | NA              | NA     | NA               | NA                |
| External rotation, % Body weight               |                 |                  |         |                  |              |                 |        |                  |                          |    |                 |        |                          |                    |    |                 |                |                  |                    |    |                 |        |                  |                   |
| Left shoulder <sup>c,d,f</sup>                 | 40              | 38.33 ± 4.79     | 38.76   | 37.50, 43.93     | 39           | 42.07 ± 8.84    | 41.27  | 35.98, 46.79     | .164                     | NA | NA              | NA     | NA                       | NA                 | 16 | 39.99 ± 7.02    | 38.87          | 34.31, 43.51     | 0.724              | NA | NA              | NA     | NA               | NA                |
| Right shoulder <sup>d,f</sup>                  | 40              | 39.01 ± 5.01     | 39.83   | 35.41, 42.55     | 39           | 41.39 ± 8.30    | 41.89  | 37.66, 48.77     | .192                     | NA | NA              | NA     | NA                       | NA                 | 16 | 39.82 ± 6.21    | 41.86          | 36.73, 45.00     | 0.990              | NA | NA              | NA     | NA               | NA                |
| Protraction, % Body weight                     |                 |                  |         |                  |              |                 |        |                  |                          |    |                 |        |                          |                    |    |                 |                |                  |                    |    |                 |        |                  |                   |
| Left shoulder                                  | 44              | 434.75 ± 113.33  | 496.53  | 390.52, 588.89   | 46           | 429.52 ± 114.72 | 455.89 | 397.63, 507.53   | .828                     | NA | NA              | NA     | NA                       | NA                 | 17 | 440.42 ± 111.37 | 427.97         | 340.63, 510.54   | 0.738              | NA | NA              | NA     | NA               | NA                |
| Right shoulder                                 | 44              | 463.08 ± 98.92   | 503.83  | 439.15, 555.60   | 46           | 469.99 ± 113.29 | 496.49 | 447.49, 523.72   | .759                     | NA | NA              | NA     | NA                       | NA                 | 17 | 473.13 ± 95.70  | 502.40         | 448.82, 527.81   | 0.780              | NA | NA              | NA     | NA               | NA                |
| Retraction, % Body mass                        |                 |                  |         |                  |              |                 |        |                  |                          |    |                 |        |                          |                    |    |                 |                |                  |                    |    |                 |        |                  |                   |
| Left shoulder                                  | 44              | 507.45 ± 123.14  | 513.95  | 429.41, 620.48   | 46           | 487.80 ± 150.31 | 504.25 | 465.62, 580.51   | .500                     | NA | NA              | NA     | NA                       | NA                 | 17 | 498.45 ± 144.30 | 492.14         | 433.36, 580.51   | 0.973              | NA | NA              | NA     | NA               | NA                |
| Right shoulder                                 | 44              | 478.22 ± 110.74  | 529.64  | 426.50, 630.12   | 46           | 471.65 ± 133.28 | 486.80 | 419.92, 544.98   | .800                     | NA | NA              | NA     | NA                       | NA                 | 17 | 481.80 ± 152.11 | 511.50         | 447.69, 643.99   | 0.797              | NA | NA              | NA     | NA               | NA                |
| Trunk extension, % Body mass <sup>c,d,f</sup>  | 48              | 324.84 ± 72.44   | 321.59  | 284.48, 356.88   | 47           | 299.66 ± 82.87  | 273.05 | 238.61, 335.76   | .036 <sup>g</sup>        | 26 | 298.31 ± 102.23 | 261.21 | 222.89, 409.69           | 0.062              | NA | NA              | NA             | NA               | NA                 | 23 | 301.63 ± 92.18  | 273.05 | 232.41, 409.16   | .241              |
| Trunk flexion, % Body mass                     | 48              | 200.08 ± 36.77   | 178.78  | 172.84, 204.38   | 47           | 186.21 ± 30.40  | 185.65 | 155.31, 208.47   | .048 <sup>g</sup>        | 26 | 181.00 ± 31.50  | 179.26 | 149.20, 210.39           | 0.032 <sup>g</sup> | NA | NA              | NA             | NA               | NA                 | 23 | 187.46 ± 34.04  | 173.97 | 157.39, 213.51   | .358              |
| Trunk flexion:extension ratio <sup>c,d,f</sup> | 48              | 1.66 ± 0.42      | 1.79    | 1.48, 1.97       | 47           | 1.61 ± 0.36     | 1.61   | 1.33, 1.81       | .417                     | 26 | 1.63 ± 0.41     | 1.52   | 1.31, 2.00               | 0.757              | NA | NA              | NA             | NA               | NA                 | 23 | 1.61 ± 0.42     | 1.72   | 1.30, 1.97       | .476              |
| <b>Flexibility</b>                             |                 |                  |         |                  |              |                 |        |                  |                          |    |                 |        |                          |                    |    |                 |                |                  |                    |    |                 |        |                  |                   |
| Extension, °                                   |                 |                  |         |                  |              |                 |        |                  |                          |    |                 |        |                          |                    |    |                 |                |                  |                    |    |                 |        |                  |                   |
| Left hip <sup>c,d,f</sup>                      | 44              | 23.5 ± 4.3       | 21.7    | 20.3, 27.7       | 44           | 23.4 ± 4.3      | 23.7   | 21.0, 29.0       | .716                     | 25 | 23.7 ± 4.8      | 22.8   | 21.0, 31.2               | 0.978              | NA | NA              | NA             | NA               | NA                 | 21 | 22.7 ± 4.1      | 26.5   | 22.0, 31.0       | .410              |
| Right hip <sup>c,d,f</sup>                     | 44              | 23.1 ± 3.7       | 20.7    | 20.0, 28.7       | 44           | 24.0 ± 5.3      | 26.0   | 21.7, 31.3       | .679                     | 25 | 24.5 ± 5.8      | 26.0   | 22.8, 33.8               | 0.445              | NA | NA              | NA             | NA               | NA                 | 21 | 23.5 ± 5.0      | 27.8   | 25.0, 31.7       | .845              |
| Left active knee                               | 48              | 18.9 ± 10.1      | 21.0    | 15.0, 27.0       | 45           | 19.2 ± 8.9      | 18.2   | 14.9, 30.3       | .882                     | 25 | 18.7 ± 8.6      | 18.2   | 15.4, 30.8               | 0.808              | NA | NA              | NA             | NA               | NA                 | 22 | 21.4 ± 9.5      | 23.3   | 15.4, 37.0       | .185              |
| Right active knee <sup>c,d,f</sup>             | 48              | 16.4 ± 10.6      | 19.3    | 17.7, 31.7       | 45           | 18.6 ± 10.0     | 22.7   | 15.0, 29.6       | .393                     | 25 | 18.7 ± 9.8      | 23.8   | 17.8, 37.1               | 0.640              | NA | NA              | NA             | NA               | NA                 | 22 | 19.4 ± 10.5     | 23.0   | 10.9, 38.3       | .299              |
| Shoulder tightness, °                          |                 |                  |         |                  |              |                 |        |                  |                          |    |                 |        |                          |                    |    |                 |                |                  |                    |    |                 |        |                  |                   |
| Left posterior <sup>d</sup>                    | 48              | 111.7 ± 7.6      | 110.7   | 108.7, 120.0     | 46           | 113.6 ± 9.5     | 115.3  | 104.9, 119.0     | .270                     | NA | NA              | NA     | NA                       | NA                 | 16 | 111.4 ± 8.7     | 107.5          | 103.0, 119.0     | 0.640              | NA | NA              | NA     | NA               | NA                |
| Right posterior                                | 48              | 110.5 ± 9.2      | 109.7   | 111.2 ± 9.6      | 46           | 111.2 ± 9.6     | 112.7  | 104.9, 120.8     | .722                     | NA | NA              | NA     | NA                       | NA                 | 16 | 108.7 ± 8.2     | 108.5          | 99.3, 117.0      | 0.312              | NA | NA              | NA     | NA               | NA                |
| Internal rotation, °                           |                 |                  |         |                  |              |                 |        |                  |                          |    |                 |        |                          |                    |    |                 |                |                  |                    |    |                 |        |                  |                   |
| Left shoulder <sup>d,f</sup>                   | 48              | 60.6 ± 8.5       | 58.0    | 51.3, 65.0       | 46           | 60.1 ± 10.2     | 61.5   | 45.7, 64.8       | .806                     | NA | NA              | NA     | NA                       | NA                 | 16 | 58.7 ± 7.5      | 62.3           | 61.2, 68.3       | 0.500              | NA | NA              | NA     | NA               | NA                |
| Right shoulder                                 | 48              | 58.2 ± 9.3       | 53.3    | 44.3, 61.7       | 46           | 56.4 ± 12.2     | 56.2   | 43.8, 64.1       | .423                     | NA | NA              | NA     | NA                       | NA                 | 16 | 54.6 ± 12.6     | 58.0           | 52.3, 68.0       | 0.284              | NA | NA              | NA     | NA               | NA                |
| External rotation, °                           |                 |                  |         |                  |              |                 |        |                  |                          |    |                 |        |                          |                    |    |                 |                |                  |                    |    |                 |        |                  |                   |
| Left shoulder <sup>c,d,f</sup>                 | 48              | 95.6 ± 9.8       | 96.0    | 90.0, 105.7      | 46           | 95.6 ± 9.9      | 100.2  | 95.5, 106.3      | .498                     | NA | NA              | NA     | NA                       | NA                 | 16 | 95.9 ± 7.4      | 98.3           | 91.7, 106.8      | 0.928              | NA | NA              | NA     | NA               | NA                |
| Right shoulder <sup>d,f</sup>                  | 48              | 97.0 ± 9.2       | 99.7    | 89.7, 106.0      | 46           | 98.2 ± 8.8      | 101.3  | 98.7, 105.2      | .334                     | NA | NA              | NA     | NA                       | NA                 | 16 | 97.6 ± 9.1      | 99.0           | 96.5, 107.0      | 0.770              | NA | NA              | NA     | NA               | NA                |
| <b>Balance</b>                                 |                 |                  |         |                  |              |                 |        |                  |                          |    |                 |        |                          |                    |    |                 |                |                  |                    |    |                 |        |                  |                   |
| Dynamic postural stability index               |                 |                  |         |                  |              |                 |        |                  |                          |    |                 |        |                          |                    |    |                 |                |                  |                    |    |                 |        |                  |                   |
| Left                                           | 44              | 0.3623 ± 0.0468  | 0.3566  | 0.3315, 0.3890   | 41           | 0.3540 ± 0.0405 | 0.3720 | 0.3490, 0.4121   | .385                     | 23 | 0.3557 ± 0.0384 | 0.3676 | 0.3516, 0.4203           | 0.735              | NA | NA              | NA             | NA               | NA                 | 20 | 0.3593 ± 0.0446 | 0.4121 | 0.3486, 0.4337   | .907              |
| Right <sup>d</sup>                             | 29              | 0.3739 ± 0.0426  | 0.3597  | 0.3476, 0.3886   | 29           | 0.3631 ± 0.0408 | 0.3802 | 0.3556, 0.4124   | .327                     | 16 | 0.3756 ± 0.0309 | 0.3824 | 0.3628, 0.4318           | 0.614              | NA | NA              | NA             | NA               | NA                 | 12 | 0.3564 ± 0.0497 | 0.3972 | 0.3354, 0.4138   | .263              |
| Medial-lateral stability index                 |                 |                  |         |                  |              |                 |        |                  |                          |    |                 |        |                          |                    |    |                 |                |                  |                    |    |                 |        |                  |                   |
| Left                                           | 44              | 0.0293 ± 0.0055  | 0.0297  | 0.0276, 0.0349   | 41           | 0.0281 ± 0.0060 | 0.0275 | 0.0223, 0.0327   | .368                     | 23 | 0.0273 ± 0.0054 | 0.0269 | 0.0233, 0.0286           | 0.157              | NA | NA              | NA             | NA               | NA                 | 20 | 0.0297 ± 0.0056 | 0.0326 | 0.0242, 0.0383   | .399              |
| Right                                          | 29              | 0.0307 ± 0.0044  | 0.0297  | 0.0267, 0.0326   | 29           | 0.0310 ± 0.0056 | 0.0298 | 0.0262, 0.0349   | .810                     | 16 | 0.0305 ± 0.0048 | 0.0293 | 0.0242, 0.0326           | 0.779              | NA | NA              | NA             | NA               | NA                 | 12 | 0.0317 ± 0.0062 | 0.0345 | 0.0257, 0.0436   | .479              |
| Sensory Organization Test score                | 44              | 80.0450 ± 4.6203 | 81.0000 | 76.0000, 84.0000 | 45           |                 |        |                  |                          |    |                 |        |                          |                    |    |                 |                |                  |                    |    |                 |        |                  |                   |

## Supplemental Table 2. Relative Risk Values

| Variable                                    | Cut-Off Value  | All Injuries                      | Lower Extremity Injuries          | Upper Extremity Injuries | Spine Injuries                    |
|---------------------------------------------|----------------|-----------------------------------|-----------------------------------|--------------------------|-----------------------------------|
|                                             |                | RR (95% CI)                       | RR (95% CI)                       | RR (95% CI)              | RR (95% CI)                       |
| <b>Age, y</b>                               | >38            | 1.186 (0.654, 2.150)              | 1.195 (0.800, 1.784)              | 1.234 (0.875, 1.739)     | 1.123 (0.790, 1.596)              |
| <b>Physiology</b>                           |                |                                   |                                   |                          |                                   |
| Body fat, %                                 | >18            | 0.825 (0.556, 1.225)              | 0.878 (0.689, 1.119)              | 0.933 (0.775, 1.122)     | 1.004 (0.798, 1.264)              |
| Anaerobic power, W/kg                       | <12.96         | 2.706 (0.771, 9.491)              | 1.506 (0.801, 2.832)              | 1.029 (0.744, 1.425)     | 1.393 (0.716, 1.667)              |
| Anaerobic capacity, W/kg                    | <7.3           | 1.533 (0.306, 7.688)              | 2.217 (0.445, 11.037)             | 1.239 (0.554, 2.773)     | 1.141 (0.509, 2.561)              |
| VO <sub>2</sub> max (mL/min/kg)             | <42.5          | 1.083 (0.643, 1.826)              | 0.982 (0.726, 1.329)              | 0.969 (0.776, 1.210)     | 1.135 (0.817, 1.576)              |
| <b>Strength, % Body mass</b>                |                |                                   |                                   |                          |                                   |
| Flexion                                     |                |                                   |                                   |                          |                                   |
| Left knee                                   | <104.4         | 1.590 (0.697, 3.630)              | 1.518 (0.851, 2.708)              | NA                       | 1.157 (0.762, 1.755)              |
| Right knee                                  | <108.97        | 1.313 (0.683, 2.524)              | 0.989 (0.708, 1.380)              | NA                       | 1.313 (0.855, 2.015)              |
| Extension                                   |                |                                   |                                   |                          |                                   |
| Left knee                                   | <195.7         | 2.593 (0.933, 7.203)              | 1.531 (0.894, 2.620)              | NA                       | 1.901 (1.029, 3.512) <sup>‡</sup> |
| Right knee                                  | <202.57        | 1.744 (0.753, 4.039)              | 2.029 (1.011, 4.075) <sup>‡</sup> | NA                       | 1.268 (0.813, 1.979)              |
| Internal rotation                           |                |                                   |                                   |                          |                                   |
| Left shoulder                               | <34.12         | 1.098 (0.614, 1.965)              | NA                                | 1.031 (0.785, 1.354)     | 0.938 (0.706, 1.244)              |
| Right shoulder                              | <47.98         | 1.486 (0.715, 3.091)              | NA                                | 1.053 (0.787, 1.408)     | 0.958 (0.710, 1.295)              |
| External rotation                           |                |                                   |                                   |                          |                                   |
| Left shoulder                               | <34.13         | 0.929 (0.537, 1.606)              | NA                                | 1.078 (0.788, 1.475)     | 1.110 (0.758, 1.625)              |
| Right shoulder                              | <34.01         | 1.012 (0.553, 1.852)              | NA                                | 0.983 (0.749, 1.291)     | 1.012 (0.714, 1.434)              |
| Protraction                                 |                |                                   |                                   |                          |                                   |
| Left shoulder                               | <329.63        | 1.169 (0.668, 2.045)              | NA                                | 0.982 (0.779, 1.236)     | 1.061 (0.777, 1.449)              |
| Right shoulder                              | <366.63        | 1.186 (0.654, 2.150)              | NA                                | 1.013 (0.783, 1.309)     | 1.013 (0.744, 1.379)              |
| Retraction                                  |                |                                   |                                   |                          |                                   |
| Left shoulder                               | <363.08        | 2.063 (0.871, 4.885)              | NA                                | 1.142 (0.829, 1.573)     | 1.741 (1.003, 3.021) <sup>‡</sup> |
| Right shoulder                              | <360.50        | 1.526 (0.776, 2.998)              | NA                                | 1.199 (0.869, 1.653)     | 1.351 (0.894, 2.043)              |
| Trunk extension                             | <248.35        | 1.418 (0.729, 2.758)              | 1.350 (0.861, 2.117)              | 1.013 (0.783, 1.309)     | 1.123 (0.790, 1.596)              |
| Trunk flexion                               | <166.82        | 1.230 (0.717, 2.108)              | 1.348 (0.912, 1.992)              | 1.018 (0.807, 1.285)     | 1.078 (0.801, 1.452)              |
| <b>Flexion:extension ratio</b>              |                |                                   |                                   |                          |                                   |
| Left knee                                   | <0.48 or >0.85 | 1.083 (0.643, 1.826)              | 0.900 (0.685, 1.182)              | NA                       | 1.250 (0.870, 1.796)              |
| Right knee                                  | <0.48 or >0.85 | 1.306 (0.756, 2.254)              | 1.085 (0.791, 1.49)               | NA                       | 1.145 (0.840, 1.562)              |
| Trunk                                       | <1.3 or >1.75  | 0.533 <sup>‡</sup> (0.341, 0.831) | 0.819 (0.635, 1.057)              | 0.913 (0.755, 1.105)     | 0.852 (0.675, 1.076)              |
| <b>Flexibility, °</b>                       |                |                                   |                                   |                          |                                   |
| Extension                                   |                |                                   |                                   |                          |                                   |
| Left hip                                    | <20            | 1.130 (0.705, 1.814)              | 1.068 (0.797, 1.430)              | NA                       | 1.130 (0.850, 1.503)              |
| Right hip                                   | <20            | 0.915 (0.596, 1.405)              | 0.992 (0.753, 1.305)              | NA                       | 1.051 (0.805, 1.373)              |
| Left active knee                            | >25            | 0.915 (0.596, 1.405)              | 0.861 (0.675, 1.099)              | NA                       | 1.130 (0.850, 1.503)              |
| Right active knee                           | >24            | 1.201 (0.733, 1.970)              | 0.940 (0.721, 1.226)              | NA                       | 1.071 (0.813, 1.412)              |
| Shoulder tightness                          |                |                                   |                                   |                          |                                   |
| Left posterior                              | <106           | 1.357 (0.802, 2.297)              | NA                                | 1.109 (0.870, 1.413)     | 1.071 (0.813, 1.412)              |
| Right posterior                             | <105           | 0.801 (0.538, 1.194)              | NA                                | 0.989 (0.808, 1.209)     | 0.879 (0.704, 1.098)              |
| Internal rotation                           |                |                                   |                                   |                          |                                   |
| Left shoulder                               | <55            | 0.967 (0.631, 1.481)              | NA                                | 0.932 (0.772, 1.125)     | 1.067 (0.823, 1.384)              |
| Right shoulder                              | <50            | 1.509 (0.883, 2.577)              | NA                                | 1.151 (0.902, 1.470)     | 1.390 (0.998, 1.936)              |
| External rotation                           |                |                                   |                                   |                          |                                   |
| Left shoulder                               | <90            | 0.923 (0.609, 1.399)              | NA                                | 0.978 (0.803, 1.192)     | 1.200 (0.906, 1.589)              |
| Right shoulder                              | <90            | 0.874 (0.576, 1.325)              | NA                                | 0.949 (0.781, 1.154)     | 1.285 (0.941, 1.754)              |
| <b>Balance</b>                              |                |                                   |                                   |                          |                                   |
| Dynamic postural stability index            |                |                                   |                                   |                          |                                   |
| Left                                        | >0.3778        | 0.754 (0.507, 1.120)              | 0.861 (0.675, 1.099)              | 0.901 (0.750, 1.082)     | 0.980 (0.763, 1.258)              |
| Right                                       | >0.3849        | 0.878 (0.540, 1.427)              | 0.962 (0.703, 1.317)              | 0.962 (0.748, 1.147)     | 0.919 (0.703, 1.202)              |
| Medial-lateral stability index              |                |                                   |                                   |                          |                                   |
| Left                                        | >0.0323        | 0.955 (0.598, 1.523)              | 0.940 (0.711, 1.242)              | 1.018 (0.807, 1.285)     | 1.078 (0.801, 1.452)              |
| Right                                       | >0.0357        | 1.440 (0.642, 3.231)              | 1.160 (0.729, 1.846)              | 1.004 (0.747, 1.350)     | 1.048 (0.716, 1.534)              |
| Sensory Organization Test Score             | <77            | 0.910 (5.880, 1.409)              | 0.958 (0.729, 1.258)              | 1.050 (0.834, 1.322)     | 1.014 (0.778, 1.322)              |
| <b>Stop-jump biomechanics</b>               |                |                                   |                                   |                          |                                   |
| Flexion at initial contact, °               |                |                                   |                                   |                          |                                   |
| Left knee                                   | <19.47         | 1.250 (0.533, 4.220)              | 0.900 (0.685, 1.182)              | NA                       | 1.250 (0.870, 1.796)              |
| Right knee                                  | <18.68         | 1.013 (0.592, 1.731)              | 0.796 (0.629, 1.007)              | NA                       | 1.013 (0.744, 1.379)              |
| Knee flexion, °                             |                |                                   |                                   |                          |                                   |
| Left maximum                                | <79.4          | 1.464 (0.784, 2.734)              | 0.982 (0.762, 1.329)              | NA                       | 1.250 (0.870, 1.796)              |
| Right maximum                               | <82.0          | 1.250 (0.708, 2.208)              | 0.982 (0.726, 1.329)              | NA                       | 1.036 (0.770, 1.393)              |
| Varus at initial contact, °                 |                |                                   |                                   |                          |                                   |
| Left knee                                   | <-5 or >5      | 0.978 (0.657, 1.457)              | 0.982 (0.767, 1.257)              | NA                       | 1.064 (0.845, 1.338)              |
| Right knee                                  | <-5 or >5      | 1.109 (0.739, 1.666)              | 1.233 (0.947, 1.605)              | NA                       | 0.886 (0.708, 1.108)              |
| Vertical ground reaction force, % body mass |                |                                   |                                   |                          |                                   |
| Left peak                                   | >241.3         | 1.613 (0.766, 3.393)              | 1.106 (0.756, 1.619)              | NA                       | 1.163 (0.798, 1.694)              |
| Right peak                                  | >223.0         | 1.478 (0.886, 2.467)              | 1.156 (0.859, 1.557)              | NA                       | 1.067 (0.823, 1.384)              |
| <b>Drop-landing biomechanics</b>            |                |                                   |                                   |                          |                                   |
| Flexion at initial contact, °               |                |                                   |                                   |                          |                                   |
| Left knee                                   | <9.39          | 0.958 (0.608, 1.510)              | 1.150 (0.829, 4.395)              | NA                       | 1.033 (0.785, 1.360)              |
| Right knee                                  | <9.30          | 0.904 (0.578, 1.413)              | 0.854 (0.666, 1.094)              | NA                       | 1.145 (0.840, 1.562)              |
| Knee flexion, °                             |                |                                   |                                   |                          |                                   |
| Left maximum                                | <51.9          | 0.897 (0.567, 1.418)              | 1.048 (0.762, 1.439)              | NA                       | 1.013 (0.763, 1.345)              |
| Right maximum                               | <53.0          | 1.137 (0.697, 1.854)              | 1.034 (0.772, 1.386)              | NA                       | 0.943 (0.737, 1.206)              |
| Varus at initial contact, °                 |                |                                   |                                   |                          |                                   |
| Left knee                                   | <-5 or >5      | 1.126 (0.570, 2.223)              | 1.375 (0.791, 2.391)              | NA                       | 1.216 (0.767, 1.929)              |
| Right knee                                  | <-5 or >5      | 0.875 (0.446, 1.718)              | 1.018 (0.626, 1.655)              | NA                       | 1.066 (0.658, 1.728)              |
| Vertical ground reaction force, % body mass |                |                                   |                                   |                          |                                   |
| Left peak                                   | >601.2         | 0.786 (0.509, 1.216)              | 1.007 (0.733, 1.383)              | NA                       | 0.968 (0.733, 1.279)              |
| Right peak                                  | >640.8         | 0.744 (0.500, 1.107)              | 1.340 (0.772, 1.386)              | NA                       | 1.217 (0.507, 2.922)              |

Abbreviations: CI, confidence interval; NA, not applicable; RR, relative risk.

<sup>‡</sup> Significant RR value (95% CI does not include 1.00).
